# Supplementary material for: An Unsupervised Strategy for Identifying Epithelial-Mesenchymal Transition State Metrics in Breast Cancer and Melanoma
Source: PubMed Central journal article supplement — iScience. 2020 Apr 22;23(5):101080. doi: 10.1016/j.isci.2020.101080 (PMC7200934; doi:10.1016/j.isci.2020.101080), 2020-04-22
Supplement: mmc1.pdf [file mmc1.pdf]

iScience, Volume 23

## **Supplemental Information**

### **An Unsupervised Strategy for Identifying Epithelial-Mesenchymal Transition State Metrics in Breast Cancer and Melanoma**

**David J. Klink II and Arezo Torang**

**Table S1. List of genes and corresponding  $K_i$  values for state metrics developed separately for breast cancer and melanoma cell lines based on CCLE gene expression, related to Figures 5, 8, and 10. Genes that overlap with the fibroblast gene list are highlighted in yellow.**

| Breast Cancer Cell Lines |                       |             |                       |                       | Melanoma Cell Lines   |             |                       |                          |                       |                            |                       |             |                       |
|--------------------------|-----------------------|-------------|-----------------------|-----------------------|-----------------------|-------------|-----------------------|--------------------------|-----------------------|----------------------------|-----------------------|-------------|-----------------------|
| Epithelial Signature     |                       |             |                       | Mesenchymal Signature |                       |             |                       | Differentiated Signature |                       | Dedifferentiated Signature |                       |             |                       |
| GENE_SYMBOL              | $K_i$ ( $\log_2$ TPM) | GENE_SYMBOL | $K_i$ ( $\log_2$ TPM) | GENE_SYMBOL           | $K_i$ ( $\log_2$ TPM) | GENE_SYMBOL | $K_i$ ( $\log_2$ TPM) | GENE_SYMBOL              | $K_i$ ( $\log_2$ TPM) | GENE_SYMBOL                | $K_i$ ( $\log_2$ TPM) | GENE_SYMBOL | $K_i$ ( $\log_2$ TPM) |
| AGR2                     | 3.411                 | SORL1       | 0.575                 | ACTA2                 | 3.826                 | LOX         | 3.049                 | ALDH3B2                  | -4.011                | ABCC3                      | 1.406                 | SERPINB2    | 4.536                 |
| ALDH3B2                  | -0.162                | SPINT1      | 3.224                 | ADAM12                | 1.053                 | LOXL2       | 5.029                 | ARAP2                    | -2.582                | ACTA2                      | 5.421                 | SERPINE1    | 6.088                 |
| ANXA9                    | 0.842                 | SPINT2      | 6.114                 | AEBP1                 | 0.789                 | LRRC15      | -2.078                | B3GAT1                   | -3.133                | ADAM12                     | 3.608                 | SFRP4       | -1.224                |
| AP1M2                    | 3.229                 | SPRR3       | -4.907                | AKAP12                | 1.603                 | LUM         | 0.844                 | CEACAM1                  | -0.123                | ANKRD1                     | 2.131                 | SPOCK1      | 5.385                 |
| ARHGAP8                  | 1.512                 | ST14        | 1.847                 | AKAP2                 | 3.466                 | MAP1B       | 2.602                 | CKMT1A                   | -3.107                | ASPN                       | -2.238                | SULF1       | 3.621                 |
| ATP2C2                   | 0.834                 | TMC6        | 2.909                 | AKT3                  | 1.980                 | MFAP5       | 0.349                 | DLL3                     | 0.188                 | BGN                        | 3.567                 | TCF4        | 2.083                 |
| BIK                      | -0.165                | TMPRSS2     | -1.064                | ANK2                  | 0.019                 | MME         | 1.240                 | EDNRB                    | 1.235                 | C1S                        | 4.607                 | TFPI        | 3.789                 |
| BLNK                     | -1.478                | TSPAN1      | 2.861                 | ANKRD1                | 0.750                 | MMP14       | 4.173                 | EN2                      | -1.807                | CDH11                      | 2.617                 | TGFB1       | 8.522                 |
| BSPRY                    | -0.331                | TSPAN15     | 3.200                 | ASPN                  | -3.605                | MMP2        | 3.048                 | ERBB3                    | 3.265                 | CFH                        | 1.919                 | THBS2       | 5.056                 |
| C1orf106                 | 0.586                 | TTC39A      | 1.869                 | AXL                   | 2.980                 | MMP3        | -1.962                | ESRP1                    | -0.554                | CITED2                     | 5.845                 | THY1        | 4.842                 |
| C4orf19                  | -0.034                | TUBBP5      | -1.711                | B2M                   | 10.551                | MT2A        | 8.204                 | FOXO3                    | -1.932                | CLU                        | 5.813                 | TNXB        | 1.628                 |
| CBLC                     | -1.002                | VAMP8       | 4.388                 | BAG2                  | 3.408                 | MVP         | 5.543                 | FXD3                     | 1.928                 | COL1A1                     | 6.420                 | TPM2        | 7.498                 |
| CDH1                     | 3.017                 | VAV3        | 1.434                 | BGN                   | 2.601                 | MXRA7       | 5.324                 | HPGD                     | -1.439                | COL3A1                     | 3.977                 | TWIST2      | 0.560                 |
| CD51                     | 1.307                 | WNT3A       | -4.361                | C1S                   | 3.387                 | MYL9        | 5.467                 | LEF1                     | 2.589                 | COL5A1                     | 4.609                 | VCAN        | 5.018                 |
| CEACAM6                  | -0.326                | WNT4        | -0.875                | CALD1                 | 5.718                 | NID2        | 2.203                 | MITF                     | 3.481                 | COL5A2                     | 4.965                 | VEGFC       | 3.187                 |
| CGN                      | 1.816                 | WNT6        | -3.454                | CCL2                  | 1.674                 | OLFML2B     | 0.722                 | MTUS1                    | 1.819                 | COL6A1                     | 7.388                 | WISP1       | -0.241                |
| CKMT1A                   | 0.752                 |             |                       | CD68                  | 3.956                 | PAPPA       | -0.374                | MYH14                    | -0.758                | COL6A2                     | 6.933                 | WNT2        | -2.599                |
| CLDN4                    | 4.194                 |             |                       | CDH11                 | 1.735                 | PCOLCE      | 5.155                 | TMC6                     | 1.244                 | COL6A3                     | 3.714                 | WNT5A       | 3.375                 |
| CLDN7                    | 3.465                 |             |                       | CDH2                  | 2.608                 | PDGFC       | 3.104                 | TUBB3                    | -3.873                | COMP                       | -0.745                | WNT5B       | 2.735                 |
| CXCR4                    | -0.294                |             |                       | CFH                   | 0.357                 | PDGFRA      | -0.591                | TUBBP5                   | -4.099                | CXCL12                     | 1.898                 | ZEB1        | 3.080                 |
| CYP4B1                   | -2.556                |             |                       | CHN1                  | 2.675                 | PDGFRB      | 0.074                 |                          |                       | CYP1B1                     | 1.646                 |             |                       |
| DSC2                     | 0.489                 |             |                       | CLIC4                 | 6.317                 | PHLDA1      | 4.025                 |                          |                       | DCN                        | 4.524                 |             |                       |
| EDN2                     | -0.558                |             |                       | COL1A1                | 6.150                 | PITX2       | -0.011                |                          |                       | DES                        | -1.976                |             |                       |
| EFNA1                    | 3.246                 |             |                       | COL3A1                | 2.372                 | PLAUR       | 4.586                 |                          |                       | EDNRA                      | -1.273                |             |                       |
| EHF                      | 1.722                 |             |                       | COL5A1                | 3.435                 | PMP22       | 3.951                 |                          |                       | EGFR                       | 2.254                 |             |                       |
| ELF3                     | 3.661                 |             |                       | COL5A2                | 3.181                 | POSTN       | 1.271                 |                          |                       | EPS8L2                     | 2.871                 |             |                       |
| EPCAM                    | 3.937                 |             |                       | COL6A1                | 5.100                 | PRKCA       | 2.585                 |                          |                       | FAP                        | 4.634                 |             |                       |
| EPN3                     | 1.121                 |             |                       | COL6A2                | 4.555                 | PROCR       | 2.850                 |                          |                       | FBN1                       | 5.531                 |             |                       |
| ERBB3                    | 3.212                 |             |                       | COL6A3                | 1.839                 | PRRX1       | 0.603                 |                          |                       | FGF1                       | 2.181                 |             |                       |
| ESRP1                    | 1.473                 |             |                       | COMP                  | -2.917                | RCN3        | 3.333                 |                          |                       | FGF2                       | 3.328                 |             |                       |
| ESRP2                    | 2.192                 |             |                       | COP2                  | 2.300                 | RECK        | 1.623                 |                          |                       | FHL1                       | 5.185                 |             |                       |
| EVPL                     | 1.066                 |             |                       | CTSB                  | 7.845                 | S100A4      | 6.338                 |                          |                       | FN1                        | 11.332                |             |                       |
| F11R                     | 3.831                 |             |                       | CXCL3                 | -0.458                | SACS        | 2.270                 |                          |                       | FOXC2                      | -0.334                |             |                       |
| FA2H                     | -1.695                |             |                       | CYBRD1                | 3.311                 | SDC2        | 4.282                 |                          |                       | FST                        | 4.619                 |             |                       |
| FBP1                     | -0.025                |             |                       | DAB2                  | 2.936                 | SERPINB2    | 0.838                 |                          |                       | FSTL1                      | 7.571                 |             |                       |
| FOXA1                    | 1.528                 |             |                       | DCN                   | 0.752                 | SERPINE1    | 4.732                 |                          |                       | GJA1                       | 2.395                 |             |                       |
| FXD3                     | 3.654                 |             |                       | DDR2                  | 1.732                 | SERPINE2    | 5.020                 |                          |                       | GLT8D2                     | 1.638                 |             |                       |
| GRB7                     | 2.017                 |             |                       | EDNRA                 | -2.082                | SFRP4       | -2.690                |                          |                       | GREM1                      | 3.809                 |             |                       |
| GRHL2                    | 0.375                 |             |                       | EIF5A2                | 2.134                 | SH3KBP1     | 3.958                 |                          |                       | HGF                        | -1.492                |             |                       |
| HIST1H4B                 | -3.644                |             |                       | EMP3                  | 4.799                 | SMARCA1     | 2.936                 |                          |                       | IFITM2                     | 6.038                 |             |                       |
| HOXC13                   | 0.820                 |             |                       | ENG                   | 3.451                 | SPARC       | 6.312                 |                          |                       | IGFBP3                     | 7.526                 |             |                       |
| ICA1                     | 1.830                 |             |                       | ENO1                  | 10.469                | SPOCK1      | 3.297                 |                          |                       | IL1R1                      | 2.317                 |             |                       |
| IL1RN                    | -1.914                |             |                       | FABP5                 | 5.250                 | SRPX        | 1.971                 |                          |                       | INHBA                      | 3.419                 |             |                       |
| IRF6                     | 1.130                 |             |                       | FAP                   | 0.521                 | SULF1       | 1.789                 |                          |                       | ITGA5                      | 6.247                 |             |                       |
| JUP                      | 4.619                 |             |                       | FBN1                  | 3.493                 | TCF4        | 0.814                 |                          |                       | ITGBL1                     | 3.675                 |             |                       |
| LAD1                     | 1.392                 |             |                       | FERMT2                | 4.687                 | TFPI        | 3.398                 |                          |                       | KRT14                      | 2.253                 |             |                       |
| LLGL2                    | 3.403                 |             |                       | FGF1                  | -0.276                | TGFB1       | 3.796                 |                          |                       | KRT7                       | 3.666                 |             |                       |
| MAP7                     | 1.918                 |             |                       | FGF2                  | 1.013                 | TGFB11      | 2.768                 |                          |                       | LGR5                       | -2.537                |             |                       |
| MST1R                    | 1.586                 |             |                       | FHL1                  | 2.509                 | TGFB2       | 2.218                 |                          |                       | LOX                        | 4.766                 |             |                       |
| MSX2                     | 0.294                 |             |                       | FHL2                  | 5.727                 | THBS2       | 0.240                 |                          |                       | LOXL2                      | 6.880                 |             |                       |
| MYH14                    | 1.305                 |             |                       | FN1                   | 7.767                 | THY1        | 1.438                 |                          |                       | LRRC15                     | 0.581                 |             |                       |
| MYO5C                    | 0.668                 |             |                       | FOXC2                 | -2.163                | TIMP3       | 4.142                 |                          |                       | MALL                       | 0.788                 |             |                       |
| OR7E14P                  | -1.719                |             |                       | FST                   | 1.858                 | TMEFF1      | 0.345                 |                          |                       | MFAP5                      | 2.224                 |             |                       |
| OVOL2                    | -0.791                |             |                       | FSTL1                 | 5.764                 | TMEM158     | 1.339                 |                          |                       | MMP2                       | 6.450                 |             |                       |
| PAK6                     | -0.971                |             |                       | FZD7                  | 2.928                 | TNC         | 3.700                 |                          |                       | MXRA5                      | -1.191                |             |                       |
| PDGFB                    | 0.847                 |             |                       | GAS1                  | -0.404                | TNFaip3     | 2.728                 |                          |                       | MYL9                       | 5.656                 |             |                       |
| POF1B                    | -2.139                |             |                       | GEM                   | 1.912                 | TNFaip6     | -2.10206              |                          |                       | NID2                       | 2.973                 |             |                       |
| PPL                      | 1.697                 |             |                       | GFPT2                 | 1.747                 | TPM2        | 6.788168              |                          |                       | NOTCH3                     | 2.482                 |             |                       |
| PRSS8                    | 1.768                 |             |                       | GJA1                  | 1.859                 | TRPC1       | 1.200131              |                          |                       | NTSE                       | 6.282                 |             |                       |
| PTK6                     | 0.323                 |             |                       | GLI2                  | -1.515                | TUBA1A      | 6.360364              |                          |                       | OLFML2B                    | 1.962                 |             |                       |
| RAB25                    | 2.307                 |             |                       | GLT8D2                | 0.756                 | TUBB3       | -4.36173              |                          |                       | PAPPA                      | 0.616                 |             |                       |
| S100A14                  | 3.154                 |             |                       | GREM1                 | 0.866                 | TUBB6       | 7.167798              |                          |                       | PDGFC                      | 2.985                 |             |                       |
| SCNN1A                   | 2.039                 |             |                       | HGF                   | -1.971                | TWIST1      | 1.57171               |                          |                       | PDGFRA                     | 2.568                 |             |                       |
| SEPP1                    | 1.217                 |             |                       | HMGA2                 | 1.475                 | TWIST2      | -0.95998              |                          |                       | PDGFRB                     | 2.617                 |             |                       |
| SLC37A1                  | 1.599                 |             |                       | HTRA1                 | 3.909                 | VCAN        | 1.996064              |                          |                       | PLAU                       | 2.660                 |             |                       |
|                          |                       |             |                       | IFITM3                | 7.043                 | VEGFC       | 2.485532              |                          |                       | POSTN                      | 3.522                 |             |                       |
|                          |                       |             |                       | IGFBP3                | 6.549                 | VIM         | 7.664345              |                          |                       | PRRX1                      | 4.508                 |             |                       |
|                          |                       |             |                       | ITGA5                 | 4.594                 | WISP1       | -2.69714              |                          |                       | PTGS1                      | 0.887                 |             |                       |
|                          |                       |             |                       | ITGB1                 | 8.822                 | WNT5A       | 2.181108              |                          |                       | PTRF                       | 7.111                 |             |                       |
|                          |                       |             |                       | LEPRE1                | 4.883                 | WNT5B       | 1.845579              |                          |                       | RCN3                       | 5.533                 |             |                       |
|                          |                       |             |                       | LGALS1                | 10.647                | ZEB1        | 0.997605              |                          |                       | RHOD                       | 0.830                 |             |                       |
|                          |                       |             |                       | LHFP                  | 2.476                 |             |                       |                          |                       | S100A4                     | 7.575                 |             |                       |

**Table S2. List of genes and associated Ki values for refined state metrics based on TCGA breast cancer tissue samples and tissue samples of common acquired melanocytic nevi and primary melanoma, related to Figures 6 and 9. Genes that overlap in the state metrics between breast cancer and melanoma are highlighted in green.**

| TCGA Breast Cancer Tissue Samples |               |                       |               | Melanocytic Nevi and Melanoma Tissue Samples |               |                             |               |
|-----------------------------------|---------------|-----------------------|---------------|----------------------------------------------|---------------|-----------------------------|---------------|
| Epithelial Signature              |               | Mesenchymal Signature |               | Differentiated Signature                     |               | De-differentiated Signature |               |
| GENE_SYMBOL                       | Ki (log2 TPM) | GENE_SYMBOL           | Ki (log2 TPM) | GENE_SYMBOL                                  | Ki (log2 TPM) | GENE_SYMBOL                 | Ki (log2 TPM) |
| ALDH3B2                           | 5.860         | ASPN                  | 5.774         | ARAP2                                        | 5.322         | ACTA2                       | 6.008         |
| C1orf106                          | 1.334         | B2M                   | 10.641        | CEACAM1                                      | 3.142         | DES                         | 1.865         |
| C4orf19                           | 1.790         | CDH2                  | 1.251         | CKMT1A                                       | 0.335         | FGF1                        | 2.198         |
| CDH1                              | 7.929         | CLIC4                 | 7.324         | EDNRB                                        | 8.655         | FOXC2                       | -4.064        |
| CLDN4                             | 7.355         | CTSB                  | 8.506         | ERBB3                                        | 6.930         | HGF                         | 2.130         |
| CLDN7                             | 6.914         | EDNRA                 | 4.265         | ESRP1                                        | 5.179         | INHBA                       | 2.599         |
| CYP4B1                            | 2.776         | FOXC2                 | 0.656         | FXD3                                         | 7.487         | ITGA5                       | 4.301         |
| DSC2                              | 4.018         | IFITM3                | 9.645         | HPGD                                         | 6.732         | KRT7                        | 1.376         |
| EHF                               | 5.528         | ITGA5                 | 5.290         | MITF                                         | 7.547         | NID2                        | 3.532         |
| FA2H                              | 1.907         | MMP3                  | 2.950         | MTUS1                                        | 5.913         | NOTCH3                      | 4.783         |
| GRB7                              | 4.897         | POSTN                 | 8.570         | MYH14                                        | 3.382         | PDGFRB                      | 5.790         |
| ICA1                              | 5.021         | SERPINE1              | 5.388         |                                              |               | SERPINE1                    | 2.665         |
| IRF6                              | 6.778         | SPOCK1                | 3.846         |                                              |               | SPOCK1                      | 2.186         |
| JUP                               | 8.167         | SULF1                 | 6.026         |                                              |               | TPM2                        | 5.225         |
| MSX2                              | 3.530         | TGFB1                 | 5.376         |                                              |               | VEGFC                       | 2.026         |
| OR7E14P                           | 2.594         | TUBB3                 | 0.189         |                                              |               | WISP1                       | 1.830         |
| POF1B                             | 1.498         | WISP1                 | 3.040         |                                              |               | WNT5A                       | 3.416         |
| PPL                               | 4.865         |                       |               |                                              |               |                             |               |
| SPRR3                             | -2.907        |                       |               |                                              |               |                             |               |
| TMPRSS2                           | 2.745         |                       |               |                                              |               |                             |               |
| TUBBP5                            | 1.073         |                       |               |                                              |               |                             |               |
| WNT3A                             | -2.816        |                       |               |                                              |               |                             |               |
| WNT4                              | 2.170         |                       |               |                                              |               |                             |               |
| WNT6                              | -0.415        |                       |               |                                              |               |                             |               |

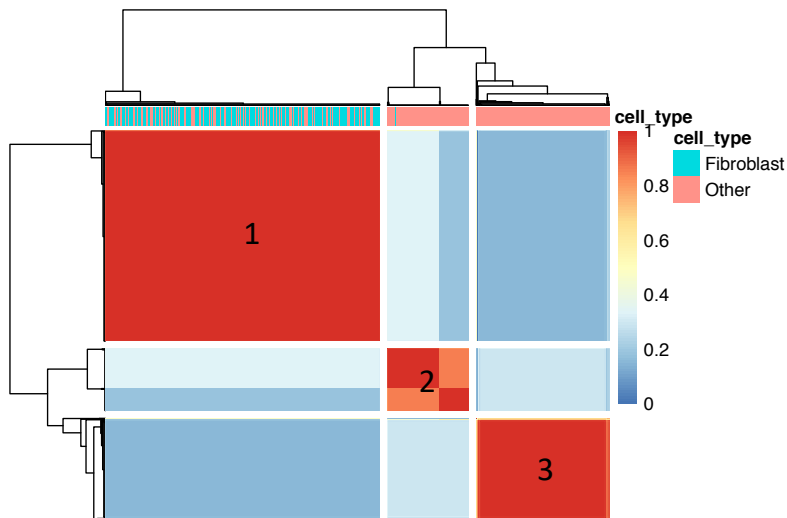

**Fig. S1. Consensus matrix for similarity and clustering of cell samples, related to Figures 6 and 9.** The symmetric 1034x1034 matrix is colored in element(i,j) by similarity in assigning cells i and j to the same cluster when the clustering parameters are changed. A similarity score of 0 (blue) indicates that the two cells are always assigned to different clusters while a score of 1 (red) indicates that the two cells are always assigned to the same cluster. The similarity of the samples are also illustrated by the dendrograms shown on the top and side. The top bar indicates whether the cell was annotated as a fibroblast based on COL1A1 and COL1A2 co-expression (aqua - fibroblast, pink - other).

## Transparent Methods

**'Omics Data.** Transcriptomics profiling of the same samples using both Agilent microarray and Illumina RNA sequencing for the breast cancer arm (BRCA) of the Cancer Genome Atlas was downloaded from TCGA data commons. Values for gene expression, expressed in TPM for RNA-seq and gene-centric RMA-normalized data for Affymetrix U133+2 microarray, for the cell lines contained within the Cancer Cell Line Encyclopedia were downloaded from the Broad data commons (Website: <https://portals.broadinstitute.org/ccle> Files: CCLE\_RNAseq\_rsem\_genes\_tpm\_20180929.txt accessed 04/04/2019 and CCLE\_Expression\_Entrez\_2012-10-18.res accessed 6/15/2018). Reverse phase protein array (RPPA) results for the cancer cell lines were obtained from the M.D. Anderson proteomics website (Website: <https://tcpaportal.org/mclp/> File: MCLP-v1.1-Level4.txt accessed 6/15/2018) (Li et al., 2017). Single-cell gene expression (scRNA-seq) for breast cancer and melanoma cells expressed in TPM were downloaded from the Gene Expression Omnibus (GEO) entries GSE75688 and GSE72056, respectively. 10X Genomics scRNA-seq data for CD45-negative cells digested from a normal human female skin sample and expressed in counts of gene-level features was downloaded from European Bioinformatics Institute (EMBL-EBI) ArrayExpress entry E-MTAB-6831. RNA-seq data expressed in counts assayed in samples acquired from benign melanocytic nevi and untreated primary melanoma tissue and associated annotation were downloaded from GEO entry GSE98394.

**Non-linear regression of protein abundance to mRNA expression.** All data was analyzed in R (V3.5.1) using the 'stats' package (V3.5.1). For each gene where complementary CCLE transcriptomic and RPPA data exist and for which their correlation coefficient was above 0.36, the non-linear function,

$$Y_{protein} = a + \frac{b \cdot X_{mRNA}}{X_{mRNA} + c}, \quad (\text{S1})$$

was regressed using the *nls* function to the corresponding protein ( $Y_{protein}$ ) and transcript ( $X_{mRNA}$ ) abundance data. As the RPPA values are normalized, the parameters  $a$  and  $b$  represent the background value and maximum detectable increase above background, respectively, while the parameter  $c$  represents the midpoint in transcript abundance within the dynamic range of the assay. A minimum in the summed squared errors between model-predicted and observed RPPA values were used to determine the optimal values of the model parameters. Using the optimal values, a threshold was estimated independently for each gene based on the transcript abundance that yields a 2.5% increase in protein abundance above background. The regression was repeated using both RNA-seq and Affymetrix transcriptomics data.

**Statistical analysis for cell-level signatures.** Principal component analysis (PCA) was performed on log base 2 transformed TPM values using the *prcomp* function in R on the CCLE RNA-seq data, which was filtered to 780 genes previously associated with epithelial-mesenchymal transition. The collective list of genes were assembled from prior studies (Sarrío et al., 2008; Carretero et al., 2010; Alonso et al., 2007; Cheng et al., 2012; Tan et al., 2014; Kaiser et al., 2016; Deng et al., 2019, 2020) and additional gene sets from MSigDB V4.0 including: "EPITHELIAL TO MESENCHYMAL TRANSITION" and "REACTOME TGF BETA RECEPTOR SIGNALING IN EMT EPITHELIAL TO MESENCHYMAL TRANSITION". PCA was applied to the genes to extract the features, where the resulting eigenvectors capture the relative influence of a gene's expression on a specific principal component and the eigenvalues represent how much information contained within the dataset is captured by a specific principal component. Drawing upon conventional hypothesis testing where significance is established by rejecting the null hypothesis that experimental observations could be explained by random chance, we used a resampling approach to establish a null hypothesis related to the eigenvalues, that is to determine the true rank of the noisy expression matrix. The resampling approach involved repetitively applying PCA ( $n = 1000$ ) to a synthetic noise dataset with the same dimensions that was generated from the original data by randomly resampling with replacement from the collection of gene expression values and assigning the values to particular gene-cell line combinations. The resulting distribution of eigenvalues and eigenvectors represent the values that could be obtained by random chance if the underlying dataset has no information (i.e., the null PCA distribution). Principal components with eigenvalues greater than the null PCA distribution were used to define the principal subspace for subsequent analysis, that is the selection of features. Similarly, the distribution in the projection of genes within the null PCA space were used to determine whether the projection of a gene along a particular PC axis was explained by random chance or not by setting thresholds along the PC2 and PC3 axes that enclosed 95% of the null PCA space. The PC projection of genes relative to the null PCA space was used to refine the extracted features.

A metric was developed to estimate the extent that a cell exhibits a gene signature corresponding to a "Epithelial/Terminally Differentiated" versus "Mesenchymal/De-differentiated" state. The state metrics ( $SM$ ) quantify the cellular state by averaging over a normalized expression level of each gene in the signature ( $reads_i$ , expressed in TPM) according to the formula:

$$SM = \frac{1}{n_{gs}} \sum_{i=1}^{n_{gs}} \frac{reads_i}{reads_i + 2^{K_i}}. \quad (\text{S2})$$

The genes included in a signature with their corresponding  $K_i$  values are listed in Table S1 and  $n_{gs}$  corresponds to the number of genes within a signature. The  $K_i$  values were estimated by clustering the log2 expression of each gene into two groups using the k-means method and the value was set as the mid-point in expression between the two groups.

**Statistical analysis for tissue-level signatures.** Genes differentially expressed in normal epidermal fibroblasts were obtained by analyzing single-cell RNA-seq data of normal skin obtained using a Genomics 10x platform and a bioinformatics workflow based on the *scater* (V1.12.2) and *SC3* (V1.12.0) packages in R. Briefly, scRNA-seq data were filtered to retain samples that had less than 50% of the reads in the top 50 genes and to remove outlier samples based on PCA analysis. Gene-level features were limited to those that were expressed at greater than 1 count in more than 10 cell samples. Read depth was normalized using a variant of CPM contained within the *scran* (V1.12.1) package, which develops a sample-specific normalization factor repetitive sample pooling followed by deconvoluting a sample-specific factor by linear algebra. Following from Davidson et al. (bioRxiv 467225), fibroblasts were annotated based on co-expression of COL1A1 and COL1A2.

Samples were clustered and genes differentially associated with each cluster were identified using the *SC3* workflow (V1.14.0) using default parameters (see Figure S1).

Prior to logistic regression analysis, TCGA BRCA data and the benign nevi and melanoma data were filtered to remove sample outliers and normalized based on housekeeping gene expression (Eisenberg and Levanon, 2013). Using normal versus tumor annotation associated with the data, ridge logistic regression was performed on log base 2 transformed TPM and median-centered values using the *glmnet* package (V2.0-18), which was limited to EMT-related genes identified in the CCLE analysis and not associated with normal fibroblasts. To minimize overfitting, ridge logistic regression was repeated 500 times using a subsample of the original data set using the genes associated with each signature separately. In each iteration, the samples were randomly assigned in an 80:20 ratio between training and testing samples. Regression coefficients were captured for each iteration using a lambda value that minimized the misclassification error of a binomial prediction model estimated by cross-validation. Accuracy was assessed using the testing samples. Genes were determined to have a consistent expression pattern if greater than 95% of the distribution in regression coefficients had the correct sign. Similarly to the cell-level analysis, state metrics were developed for bulk tissue-level RNA-seq measurements to estimate the extent that a tissue sample exhibits a gene signature corresponding to a "Epithelial/Terminally Differentiated" versus "Mesenchymal/De-differentiated" state. The genes included in a signature and their corresponding  $K_i$  values are listed in Table S2.

**Data and Code Availability.** The code used in the analysis can be obtained from the following GitHub repository:

- [https://github.com/KlinkeLab/DigitalCytometry\\_EMT\\_2020](https://github.com/KlinkeLab/DigitalCytometry_EMT_2020)
